# Supplementary material
Source: PubMed Central journal article supplement (PMC3286114)
Supplement: NIHMS357241-supplement-1.pdf [file NIHMS357241-supplement-1.pdf]

**SUPPLEMENTAL DIGITAL CONTENT:**

Supplemental Table 1. Source and dilutions of the primary antibodies used for immunohistochemistry.

**Supplemental Table 1.** Antibodies used for immunohistochemistry.

| Protein       | Host   | Source                    | Catalog # | Dilution    |
|---------------|--------|---------------------------|-----------|-------------|
| AKT           | Mouse  | Cell Signaling Technology | 9272      | 1:200       |
| Catalase      | Rabbit | Chemicon,                 | AB1212    | 1:800       |
| CAV-1         | Rabbit | Santa Cruz                | sc-894    | 1:200       |
| COX-1         | Goat   | Santa Cruz                | sc-1752   | 1:400       |
| COX-2         | Rabbit | Cayman Chemical           | 160106    | 1:800       |
| eNOS          | Mouse  | BD Transduction           | 610296    | 1:800       |
| phospho-eNOS  | Mouse  | BD Transduction           | 612393    | 1:800       |
| MDA           | Rabbit | Abcam                     | Ab6463    | 1:200       |
| Nitrotyrosine | Rabbit | Chemicon                  | AB5411    | 1:200       |
| VCAM-1        | Mouse  | MU-CIC core               | None      | 10-30 ug/ml |
| SOD-1         | Rabbit | Stressgen                 | SOD-100   | 1:800       |
| SOD-2         | Rabbit | Stressgen                 | SOD-110   | 1:800       |
| ecSOD         | Rabbit | Assay Designs             | SOD-106   | 1:400       |
| SRA           | Mouse  | Transgenic Inc.           | KT-022    | 1:100       |

CAV-1, caveolin-1; COX-1 and -2, cyclooxygenase-1 and -2; eNOS, endothelial nitric oxide synthase; MDA, malondialdehyde; VCAM-1, vascular cell adhesion molecule-1; SOD-1 and SOD-2, superoxidase dismutase-1 and -2; ecSOD, extracellular superoxidase dismutase; SRA, scavenger receptor A.
